# Supplementary material for: Dietary rice bran promotes resistance to Salmonella enterica serovar Typhimurium colonization in mice
Source: PubMed Central journal article supplement (PMC3390288; doi:10.1186/1471-2180-12-71), 2012-07-04

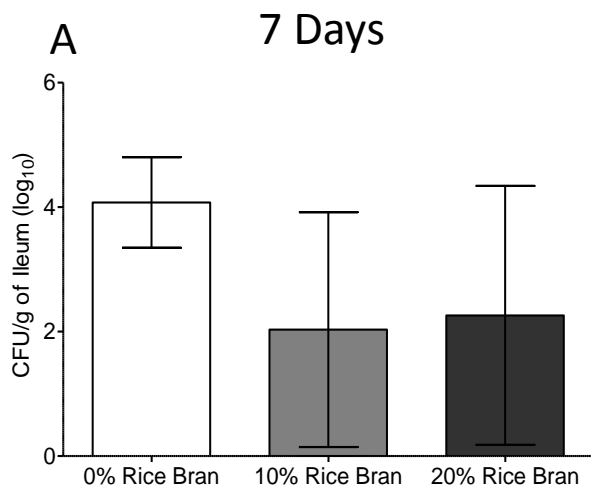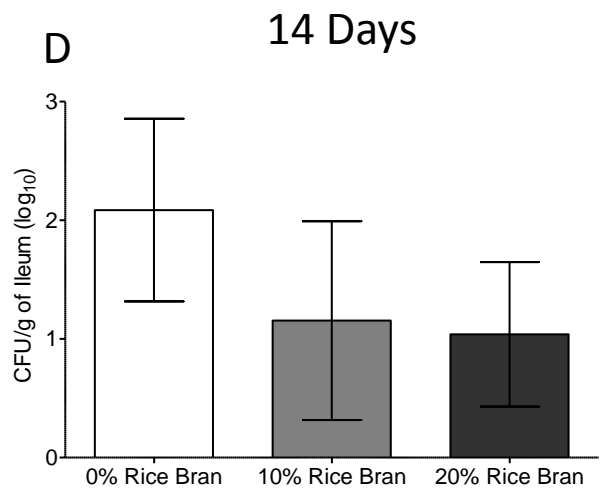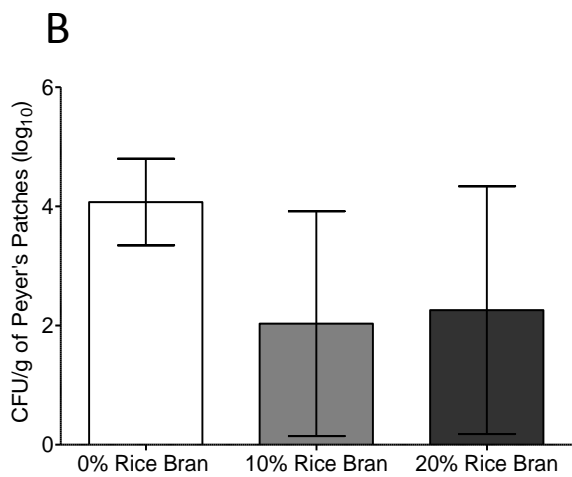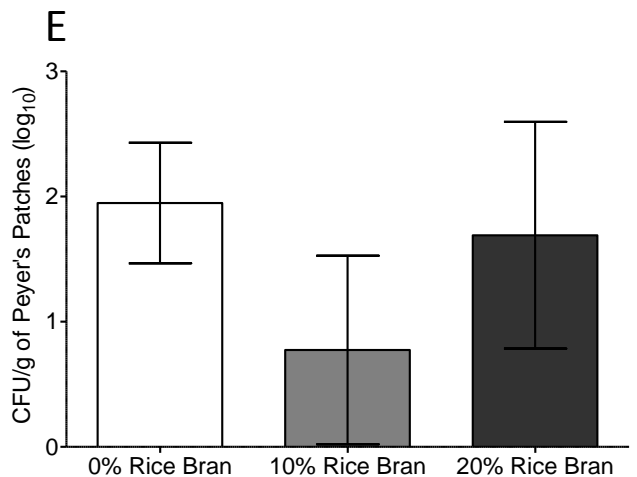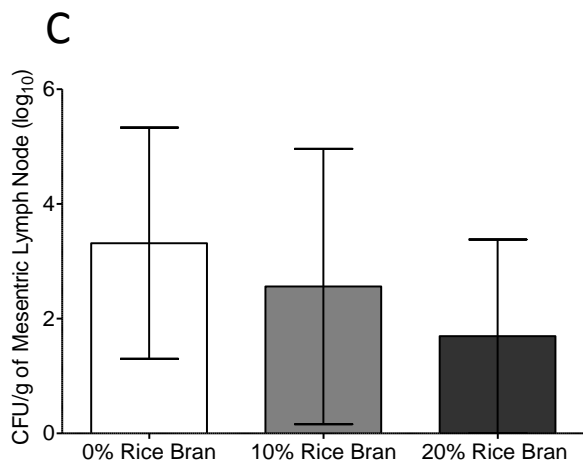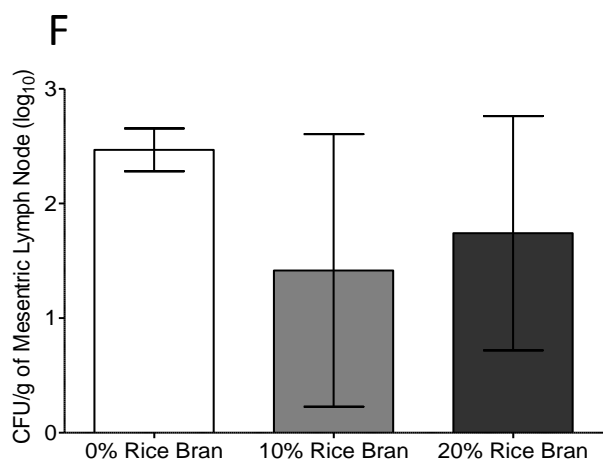

Supplement: 1471-2180-12-71-S1.pdf [file 1471-2180-12-71-S1.pdf]
